# Supplementary material
Source: Research Square preprint supplement (doi:10.21203/rs.3.rs-9634039/v1)
Supplement: Supplementary file 1 [file 59ee2311f22f3e02bc1d82d3.docx]

**Table 1.0: Summary of Extracted data for Included studies.**

| No. | Author/Year | Study Design | Geographical Location | Population/Focus | Research Objective | Main Finding | Paper Recommendation |
| --- | --- | --- | --- | --- | --- | --- | --- |
| 1. 1 | Adjei et al. (2022) | Cross-sectional market surveillance survey | Ghana (six districts of Greater Accra Region) | Modern retail outlets (supermarkets and mini-marts; n=67) | To determine the healthiness of foods sold at modern retail outlets using NOVA classification and energy density criteria | 86.6% of outlets were mini-marts; 85% of total shelf area occupied by unhealthy foods (ranging from 9,262 m² in Ashiaman to 41,892 m² in Accra Metropolis). Refined grains/grain products (30%) and sugar-sweetened beverages (20.1%) were most available. Ratio of ultra-processed to unprocessed foods averaged 5:1 | This study reveals widespread availability of ultra-processed foods in modern retail outlets. Public health authorities and food regulators, in partnership with other stakeholders, need to institute measures that improve availability of healthy foods within supermarkets and mini-marts |
| 1. 2 | Agbozo et al. (2018) | Cross-sectional survey | Ghana (Ga West municipality – four peri-urban communities) | Older adults aged 60–70 years (n=120) | To investigate the influence of nutrition knowledge and dietary patterns on nutritional status (BMI) of community-dwelling ambulatory older adults | Nutrition knowledge was adequate (28%), but dietary patterns were mostly fair (40%) or poor (53%). Underweight was 10%; overweight/obesity was 21.7%. Strong significant positive correlation existed between diet quality and nutritional status (r=0.699, p=0.027); knowledge showed weak insignificant correlations | Nutrition knowledge was adequate but dietary intake was poor and a quarter were malnourished. Supporting the elderly to make healthy dietary choices and ensuring household food security is crucial to preventing malnutrition |
| 1. 3 | Agyapong et al. (2024) | Cross-sectional household survey | South Africa (Khayelitsha urban, Mount Frere rural) and Ghana (Ahodwo urban, Ejuratia rural) | Households (n=1,299); adult responsible for food acquisition | To determine differences in food consumption by NOVA food categories and their relation to poverty and food supply systems | Supermarkets were prominent for ultra-processed foods in South Africa, informal outlets in Ghana. Unprocessed food consumption higher in South Africa (58.2%) than Ghana (41.8%). Deprivation associated with increased odds of infrequent consumption of both unprocessed (OR 3.431, p<0.001) and ultra-processed foods (OR 2.656, p<0.001) in South Africa, but not Ghana | Different food supply systems and poverty are associated with household acquisition of NOVA food classes. Policies should target formal shops in South Africa and informal shops in Ghana to reduce consumption of key obesogenic foods |
| 1. 4 | Amevinya et al. (2020) | Cross-sectional observational study (direct observation and systematic coding of all visible advertisements using a standardised outdoor advertising audit tool) | University of Ghana campus (Legon, Accra, Ghana) | All sighted commercial advertisements/signage on the university campus (including food and non-food) | To examine the extent, nature, and promotional techniques of commercial food advertising, messaging, and signage on the campus of Ghana’s oldest and largest university | Of 503 advertisements recorded, 47.3% (n=238) were food-related; among food ads, 57.6% promoted unhealthy products (sugar-sweetened drinks were most common at 37.0%), 38.7% healthy, and 3.8% miscellaneous; promotional techniques included claim pronouncements, characters, emotional appeals, premium offers, and price promotions | The preponderance of unhealthy food advertising has significant public health implications for purchasing behaviour and consumption; urgent publicity, advocacy, and development of local policies are needed to regulate food promotion activities across Ghanaian food environments, including educational institutions |
| 1. 5 | Amevinya et al. (2022) | Cross-sectional outdoor advertisement audit | Ghana (Greater Accra Region – most urbanized and populous region) | Outdoor food/beverage advertisements within 250 m of 200 randomly selected primary and junior high schools | To examine the extent and nature of food and beverage advertising around primary and junior high schools | 5,887 advertisements documented; 42% were for foods/beverages. 70% featured non-core/unhealthy products; 50% were ultra-processed. Sugar-sweetened beverages were most advertised (32%). Promotional characters (14%) and premium offers (8%) were common | There is an abundance of unhealthy food advertisements around primary and junior high schools. Policy actions such as restricting the promotion of unhealthy foods in children’s settings are needed to protect pupils from such advertising practices |
| 1. 6 | Annan et al. (2025) | Household food consumption survey + value-chain tracing (product pathway analysis) | Ghana (Ashanti Region rural/urban communities; nationwide for value chain) | 612 households + 209 retailers + 185 wholesalers/distributors | To explore characteristics of Ghanaian households’ consumption of obesogenic versus protective foods, including their retail, distribution, and origin | ~20% of households consumed sugar-sweetened beverages and confectionery weekly; only 2% consumed processed meat. Protective foods: fish (74.5%), cooked vegetables (53.1%), legumes (22.8%). Frequent obesogenic consumption higher in younger, male, urban, and more educated purchasers. Most households (~80%) did not discriminate between obesogenic and protective foods. Obesogenic foods predominantly imported; protective foods had strong local producer presence | Characteristics of purchasers from retail/wholesale outlets agree with those of households. While protective foods had a strong local producer presence, obesogenic foods were predominantly imported. Policy and intervention efforts should target obesogenic food value chains and promote protective local foods |
| 1. 15 | Anih et al. (2025) | Narrative review synthesizing epidemiological, clinical, and experimental evidence | Global (mechanisms applicable to low- and middle-income settings including Ghana) | General populations exposed to ultra-processed foods (UPFs); focus on cellular and molecular pathways | To elucidate mechanistic pathways by which industrial additives and ultra-processing in UPFs contribute to metabolic dysfunction | UPF additives (emulsifiers, sweeteners, preservatives) disrupt gut microbiota and intestinal barrier integrity, promote endotoxin translocation, trigger chronic low-grade inflammation, induce oxidative stress and mitochondrial dysfunction, and impair nutrient-sensing pathways (mTOR, AMPK, SIRT1), leading to insulin resistance, lipid dysregulation, and metabolic disease | Conventional nutrient-centric dietary guidelines are insufficient. Public health policies should incorporate food-processing classifications (e.g., NOVA), reassess additive safety, and prioritise minimally processed foods to mitigate cellular disruption and the metabolic disease pandemic |
| 1. 16 | Aryeetey et al. (2016) | Cross-sectional food retail assessment (observations, in-depth interviews with retailers, household survey) | Ghana (Ashongman Estates, suburb of Accra) | Households (n=75) and food retail outlets in a suburban community | To assess the food retail system and family food purchase behavior in a suburban Accra community | Traditional markets remain the primary source of household food purchases (99% of households); processed foods are widely available in both supermarkets and traditional markets/minimarkets. Preference for traditional markets due to variety, lower price, and proximity | Interventions are needed to ensure food markets promote access to fresh produce rather than processed foods to support consumer health |
| 1. 18 | Atun et al. (2017) | Commission report (narrative synthesis of epidemiological, health systems, and policy evidence) | Sub-Saharan Africa (with specific focus on Ghana) | Populations, health systems, and policy environments across sub-Saharan Africa | To review the clinical care, epidemiology, and policy response to diabetes in sub-Saharan Africa and propose solutions | Diabetes prevalence is rising rapidly; health systems are ill-equipped to manage the growing burden alongside infectious diseases. Type 1 diabetes remains fatal without insulin access; macrovascular and microvascular complications are common | Coordinated, broad-based health system strengthening is essential; integrate diabetes care into existing platforms and prioritise prevention through policy and community interventions |
| 1. 20 | Baatiema et al. (2024) | Qualitative study protocol (part of mixed-methods CARE Diabetes project) | Ghana (Ga Mashie, urban poor community in Accra) | Urban poor community members, care providers, and policy stakeholders affected by or involved in T2D prevention/control | To generate contextual understanding of T2D (policies, environment, healthcare delivery, social norms) to interpret quantitative findings and identify community-based intervention opportunities | Protocol describes six complementary qualitative studies focusing on community perspectives of environmental influences, food markets, healthcare access/supply, and historical context of Ga Mashie | Robust contextual data are essential for interpreting quantitative findings and developing community-based interventions. Results will be shared with the Ga Mashie community and Ghanaian health policy stakeholders for diabetes prevention and control |
| 1. 23 | Boatema et al. (2018) | Qualitative study (semi-structured in-depth interviews; thematic analysis guided by the socio-ecological model) | Accra, Ghana (three urban poor communities: Agbobloshie, James Town, Ussher Town) | 30 lay adults residing in urban poor communities | To examine lay understandings of healthy/unhealthy food practices, factors shaping food choices, and implications for designing population-level health interventions | Food is viewed as inherently healthy in its raw/natural state; healthfulness is modified by preparation method (e.g., frying vs. boiling) and consumption timing; healthy cooking entails ingredient selection, appropriate methods, and hygiene; healthy eating comprises the right meals, quantity, and timing; choices are shaped by multi-level factors (finances, psycho-physical state, significant others, community resources) | Dietary and NCD interventions must build upon rather than challenge existing multi-level lay beliefs and practices, integrating individual, interpersonal, community, and structural influences for greater acceptability and effectiveness |
| 1. 24 | Boateng et al. (2018) | Multi-centre cross-sectional study (RODAM cohort) | Ghana (urban and rural sites) and Europe (Ghanaian migrants in Amsterdam, London, Berlin) | Ghanaian adults aged 40–70 years without prior CVD (n=3,586) | To assess agreement between three cardiovascular risk prediction algorithms (Framingham non-laboratory, Framingham laboratory, and Pooled Cohort Equations) | Risk estimates differed substantially across algorithms (19.4%, 12.3%, and 5.8% classified as high risk, respectively). Concordance was moderate and varied by migrant vs. home population | CVD risk prediction algorithms are not interchangeable in African ancestry populations. Validation against actual CVD outcomes is urgently needed to select appropriate tools for use in sub-Saharan Africa |
| 1. 26 | Boateng et al. (2019) | Multi-center cross-sectional study (RODAM) using principal component analysis for dietary patterns and Pooled Cohort Equations for 10-year ASCVD risk | Ghana (rural and urban sites) and Europe (Amsterdam, London, Berlin) – Ghanaian populations | Ghanaian adults aged 40–70 years without prior ASCVD (n=2,976 after exclusions) | To assess associations between three derived dietary patterns (‘mixed’; ‘rice, pasta, meat, and fish’; ‘roots, tubers, and plantain’) and estimated 10-year atherosclerotic cardiovascular disease (ASCVD) risk | Stronger adherence to the ‘mixed’ and ‘rice, pasta, meat and fish’ patterns was associated with lower predicted 10-year ASCVD risk (especially in urban Ghana); the ‘roots, tubers and plantain’ pattern was directly associated with increased risk. Associations were attenuated after confounder adjustment except for the ‘mixed’ pattern in urban Ghana (PR Q5 vs Q1: 0.70; 95% CI: 0.53–0.93; P-trend=0.013) | Adherence to ‘mixed’ and ‘rice, pasta, meat and fish’ dietary patterns appears to reduce predicted 10-year ASCVD risk in urban Ghana. Further investigations are needed to understand contextual-level mechanisms influencing dietary habits and to support context-specific dietary recommendations for CVD prevention among sub-Saharan African populations |
| 1. 30 | Boysen et al. (2018) | Econometric panel-data analysis (cross-country panel constructed for SSA; regression models examining tariff differentials) | Sub-Saharan Africa (multi-country panel) | National-level aggregates: obesity and underweight prevalence; highly processed vs. less-processed food imports | To quantify the impact of higher import tariffs on highly processed foods (relative to less-processed foods) on obesity and underweight prevalence in SSA, differentiated by income level and gender | Higher tariffs on highly processed foods significantly reduced obesity prevalence (stronger effects in higher-income SSA countries and among women) while also influencing underweight rates. Consumer price differentials between processed and less-processed food groups were effective levers for both outcomes; the two malnutrition burdens cannot be treated separately. | Implement differential tariffs or taxes on highly processed foods as part of a broader food-price policy package; monitor impacts on both obesity and underweight, especially in lower-income SSA settings; integrate gender- and income-stratified evaluations into policy design. |
| 1. 31 | Casu et al. (2022) | Comprehensive desk review and policy mapping (Transform Nutrition West Africa) | West Africa (regional focus: Benin, Burkina Faso, Côte d’Ivoire, Ghana, Mali, Niger, Nigeria, Senegal, Sierra Leone, Togo) | Nutrition-relevant policies and strategies across sectors | To map and analyse the extent to which nutrition is integrated into policies across West African countries. | Policies showed varying integration of nutrition; nutrition-specific interventions were more explicit than nutrition-sensitive ones. Key gaps included limited equity-sensitive targeting, weak multi-sectoral coherence, and insufficient focus on adolescents and urban populations. Framing of malnutrition challenges was often incomplete. | Strengthen internal policy coherence and multi-sectoral coordination. Prioritise equity-sensitive targeting across the life cycle and improve monitoring of nutrition-relevant policies to accelerate progress toward nutrition security in West Africa. |
| 1. 34 | Dake et al. (2016) | Cross-sectional study (GPS mapping of food outlets; household survey; multilevel regression analysis) | Accra, Ghana (urban poor communities) | Urban poor residents (females 15–49 years, males 15–59 years); local food environment and BMI | To examine characteristics of the local food environment in an urban-poor setting and its association with obesity risk (BMI) | The food environment is obesogenic: abundant out-of-home cooked foods, convenience stores, and limited fruits/vegetables. Each additional convenience store linked to +0.2 kg/m² BMI; access to convenience stores independently associated with higher obesity after controlling for socio-demographics and behaviors | Regulate availability and access to convenience stores in urban-poor communities; simultaneously encourage healthier food offerings within convenience stores to reduce obesity risk |
| 1. 35 | Danquah et al. (2018) | Multi-center cross-sectional study (RODAM) | Ghana (rural and urban) and Europe (Amsterdam, London, Berlin) | Ghanaian adults (n=3,810) | To investigate associations of between- and within-food group variety (FVS, DDS, DQI-I variety) and previously identified dietary patterns with type 2 diabetes | Food Variety Score (FVS) was inversely associated with T2D (OR per 1 SD increase: 0.81; 95% CI 0.71–0.93). The “rice, pasta, meat and fish” dietary pattern was also inversely associated with T2D (OR per 1 SD: 0.82; 95% CI 0.71–0.95); this effect was slightly attenuated by the FVS | Between-food group variety may exert beneficial effects on glucose metabolism and partially explains the inverse association of the “rice, pasta, meat and fish” dietary pattern with T2D in this Ghanaian population |
| 1. 36 | Danquah et al. (2019) | Multi-centre cross-sectional study (RODAM) with anthropometric and questionnaire data | Rural and urban Ghana; Europe (Amsterdam, London, Berlin) | 5,575 Ghanaian adults (mean age 46.2 years; 62% female) | To evaluate childhood socio-economic status (parental education) and markers of early-life nutritional status (leg length, leg-length-to-height ratio) as risk factors for adult waist circumference and type 2 diabetes, independent of adult lifestyle/SES | Lower parental education was associated with higher waist circumference (Δ 1.6–3.4 cm); reduced leg length and leg-length-to-height ratio linked to higher waist circumference; in men only, shorter leg length increased odds of type 2 diabetes (OR per SD decrease 1.1, 95% CI 1.0–1.3) | Prevention efforts for abdominal obesity and type 2 diabetes among Ghanaian populations should begin in early childhood, targeting socio-economic and nutritional disadvantages |
| 1. 37 | Delpino et al. (2022) | Systematic review and meta-analysis of longitudinal studies | International (meta-analysis of prospective cohorts) | Adults in longitudinal observational studies examining ultra-processed food (UPF; NOVA classification) consumption | To synthesise longitudinal evidence on the association between UPF consumption and incident type 2 diabetes (T2D) risk and to quantify the dose-response relationship via meta-analysis | Moderate UPF intake increased T2D risk by 12% (RR 1.12, 95% CI 1.06–1.17); high intake increased risk by 31% (RR 1.31, 95% CI 1.21–1.42), demonstrating a clear dose-response effect with moderate-to-high credibility of evidence | The consumption of UPF increases T2D risk in a dose-dependent manner; public health strategies should prioritise reducing UPF intake to mitigate diabetes burden |
| 1. 38 | Duodu et al. (2025) | Cross-sectional study | Ghana (Ashanti region) | Adults living with type 2 diabetes mellitus (T2DM) (n=398) | To examine the association between dietary self-care adherence (general and specific diet) and depression | Depression prevalence was 38.7%. High overall dietary self-care adherence was associated with lower odds of depression (AOR=0.28; 95% CI 0.10–0.78). High specific diet score was protective (AOR=0.80; 95% CI 0.73–0.88); general diet score was not significant | The significant inverse association between adherence to specific diets and depression highlights an area clinicians and public health authorities must prioritise. Encouraging specific dietary recommendations could reduce depression risk; clinicians should emphasise mental health benefits during counselling |
| 1. 39 | Dzodzomenyo et al. (2023) | Cross-sectional market surveillance survey | Ghana (Greater Accra slums) and Kenya (Kisumu slums) | Retail outlets and transactions (502 in Ghana, 396 in Kenya) | To evaluate how NOVA classification and local resident classifications predict plastic packaging of foods/beverages | Plastic packaging more prevalent in Ghana (94%) than Kenya (56.7%). NOVA processed/ultra-processed foods associated with greater plastic packaging (moderate agreement between resident classifications). Plastic packaging lower in Kenya where single-use carrier bags banned | Household expenditure surveys have potential for monitoring plastic waste generation. Survey-based monitoring should incorporate expert knowledge of national context and retail environment to reflect realities of packaging use |
| 1. 40 | Dzodzomenyo et al. (2025) | Cross-sectional market surveillance survey (georeferenced transaction observations) | Greater Accra, Ghana (low-income areas) and Kisumu, Kenya (low-income areas) | 502 retail transactions in Ghana and 396 in Kenya (foods/beverages at supermarkets, markets, kiosks, shops) | To evaluate the extent to which the NOVA food classification and locally derived commodity classifications predict plastic food/beverage packaging prevalence | NOVA processed/ultra-processed foods and locally defined food/beverage classes were significantly associated with greater plastic packaging (similar predictive performance in both cities); plastic packaging prevalence was significantly higher in supermarkets and in Greater Accra (94.0%) vs. Kisumu (56.7%); single-use carrier bag ban in Kenya reduced plastic use | Household expenditure surveys offer strong potential for scalable monitoring of plastic waste generation when combined with NOVA or local classifications; monitoring systems must incorporate national retail context and expert knowledge of packaging practices to target pollution hotspots effectively |
| 1. 41 | Ecker & Fang (2016) | Narrative review / chapter in ReSAKSS Annual Trends and Outlook Report | Ghana (national level, with rural–urban comparisons) | Ghanaian population undergoing economic development and nutrition transition | To examine food consumption patterns and trends in the context of Ghana’s rapid economic development and structural transformation | High economic growth and urbanisation have driven nutrition transition: shifts from own production to market purchases, increased processed foods, and changes in dietary patterns (higher calorie density, animal-source foods). Traditional staples remain important but urban diets show signs of Westernisation | Ghana’s impressive economic progress must be matched by nutrition-sensitive policies to address emerging challenges of overweight/obesity and diet-related NCDs. Targeted interventions are needed to promote healthier diets amid ongoing structural transformation |
| 1. 45 | Galbete et al. (2017) | Multi-center cross-sectional study (RODAM) | Ghana (rural and urban Ashanti region) and Europe (Amsterdam, London, Berlin) | Ghanaian adults (n=4,543 for dietary description; n=3,905 for pattern adherence) | To describe food consumption, nutrient intake, dietary patterns, and socio-demographic determinants of pattern adherence among Ghanaian migrants in Europe and their compatriots in Ghana | Macronutrient contributions and food preferences differed by site: rural Ghana diets were starch-heavy; urban Ghana diets were dominated by animal-source foods; European diets were highly diverse. Three dietary patterns were identified: “mixed” (female, higher education, Europe), “rice, pasta, meat and fish” (male, younger, urban Ghana), and “roots, tubers and plantain” (rural Ghana) | Marked differences in dietary behaviour reflect nutrition transition driven by urbanisation and migration. Context-specific interventions are required to promote healthier dietary patterns in Ghanaian populations across locations |
| 1. 46 | Galbete et al. (2018) | Multi-center cross-sectional study (RODAM) | Ghana (rural and urban Ashanti Region) and Europe (Amsterdam, London, Berlin) | Ghanaian adults (n=4,543 for dietary patterns; n=4,213 for diet–disease associations) | To study associations of dietary patterns (DPs) with type 2 diabetes (T2D) among Ghanaian adults | Higher adherence to the “rice, pasta, meat and fish” DP (legumes, rice/pasta, meat, fish, cakes/sweets, condiments) was associated with decreased odds of T2D (OR per 1 SD = 0.80; 95% CI 0.70–0.92). Similar associations in urban Ghana and Europe. Neither the “mixed” nor the “roots, tubers and plantain” DP was associated with T2D in the total population (after excluding self-reported T2D, the latter showed inverse association) | In this Ghanaian population, DPs characterized by legumes, fish, meat and confectionery were inversely associated with T2D. The effect of a traditional-oriented diet remains unclear |
| 1. 47 | Gatimu et al. (2016) | Cross-sectional study using Study on Global AGEing and Adult Health (SAGE) Wave 1 data (2007–2008) | Ghana (nationally representative) | Adults aged ≥50 years (n=4 135) | To determine the prevalence and socio-economic/behavioural determinants of diabetes among older adults in Ghana. | Weighted prevalence = 3.95% (95% CI 3.35–4.55). Low physical activity and obesity increased odds in women; older age and higher education increased odds in men. | Diabetes prevention programmes should target younger populations with gender-specific strategies emphasising physical activity and nutrition to reduce the future burden among older adults. |
| 1. 48 | Gato et al. (2017) | Cross-sectional survey using self-reported questionnaire | Ghana (Cape Coast metropolis, Central Region) | Adults aged ≥18 years (n=482) | To assess risk factors for diabetes, nutritional practices, and lifestyle changes among adults in Cape Coast | 8.3% self-reported diabetes diagnosis. Older age (≥50 years) and higher body weight were independently associated with diabetes. No significant differences in nutritional practices or lifestyle changes (physical activity, fruit/vegetable intake, weight management) between diabetics and non-diabetics | The percentage of self-reported diabetes was consistent with previous studies. Findings highlight the need for more patient education on physical activity and weight management |
| 1. 49 | Gómez-Donoso et al. (2020) | Prospective cohort study (SUN Project) | Spain (Mediterranean cohort) | 14,907 Spanish university graduates initially free of depression (mean age 36.7 years) | To prospectively evaluate the association between baseline UPF consumption (NOVA classification) and incident depression over 10.3 years of follow-up | Highest vs lowest quartile of UPF consumption was associated with 33% higher risk of incident depression (HR 1.33, 95% CI 1.07–1.64; p-trend = 0.004), with stronger effect among participants with low physical activity | UPF consumption is positively associated with depression risk; reducing UPF intake, particularly among physically inactive individuals, may help prevent depression |
| 1. 50 | Gudjinu & Sarfo (2017) | Unmatched case–control study (48 T2D cases, 88 controls; WHO STEPS, GPAQ, REAP tools + anthropometry and fasting biochemistry) | Ho Municipality, Volta Region, Ghana (two major public hospitals) | Out-patients aged 35–62 years attending hospital OPD (T2D cases vs. non-diabetic controls) | To identify socio-demographic, anthropometric, physical-activity, dietary, and biochemical risk factors for T2D | Middle socio-economic class (OR 5.03), low physical activity, and low fruit intake were independent risk factors for T2D. Rural residence was protective, largely mediated by higher physical activity levels. Physical activity confounded the residence–T2D relationship. | Realign local policies to encourage middle-SES individuals to reside in rural areas where physical activity is higher and fruit consumption greater; promote community-level physical-activity and fruit-intake interventions to reduce T2D incidence. |
| 1. 51 | Holdsworth M, Pradeilles R, Tandoh A et al. (2020) | Qualitative 24-hour dietary recall study (structured eating-practice analysis) | Ghana (2 cities) and Kenya (1 city) – deprived urban neighbourhoods | 459 adolescents and adults (≥13 y, mixed sex) in low-income urban settings | To investigate how unhealthy foods/beverages are embedded in everyday eating practices (periodicity, tempo, synchronisation) and identify context-relevant policy levers. | Structured three-meal pattern with limited snacking; widespread consumption of energy-dense nutrient-poor (EDNP) items—SSBs at 78.5 % (Kenya) and 36.2 % (Ghana) of episodes, sweet foods at breakfast, fried foods at all meals (especially evening in Kenya); >84 % consumed energy-dense nutrient-rich traditional dishes; lowest SES groups had highest unhealthy intake; most episodes <30 min, eaten at home (>77 %) with family (>46 %) or alone (>42 %). | Multi-sectoral policy action required: enhance access to convenient nutrient-rich foods (subsidies, vendor training); fiscal/advertising measures to limit unhealthy foods and SSBs (especially Ghana); adapt food-based dietary guidelines to reduce sugar/fat at mealtimes. |
| 1. 53 | Karugu et al. (2025) | Ecological time-series analysis using multivariate Vector Autoregressive (MVAR) models | Nine African countries (Cameroon, Côte d’Ivoire, Ethiopia, Ghana, Kenya, Morocco, Nigeria, South Africa, Uganda) | National-level aggregate data on SSB sales, T2D prevalence, and number of adults with T2D (2010–2024) | To assess temporal trends in sugar-sweetened beverage (SSB) sales and quantify associations with T2D burden | SSB sales increased markedly (e.g., +173.8% per capita in Cameroon); significant positive associations between SSB sales and T2D burden/prevalence were observed in multiple countries (e.g., Ghana β = 0.41, Ethiopia β = 0.37) | Rising SSB sales are contributing to the growing T2D burden in Africa; context-specific regulatory policies (fiscal taxes, front-of-pack labelling, marketing restrictions) are required to curb dietary transitions |
| 1. 54 | Kébé SD, Diouf A, Sylla PMdD et al. (2025) | Cross-sectional descriptive study (multi-step 24 h dietary recall + NOVA classification) | Dakar, Senegal (urban) | 301 urban adults (20–69 y) | To assess ultra-processed food (UPF) consumption and its contribution to intakes of critical nutrients linked to non-communicable diseases (NCDs). | UPF contributed 17.4 % of total energy, 43 % free sugars, 26.9 % total fat, 24.4 % sodium, and 24 % potassium; higher UPF intake associated with higher energy, free sugars, fat, potassium, and protein intakes and with non-recommended levels of total fat (OR=2.56) while inversely associated with non-recommended potassium and protein; overall poor diet quality. | UPF consumption is a significant contributor to critical nutrients linked to NCDs and is likely a major driver of the rising NCD burden in urban Senegal; further monitoring and policy measures are warranted. |
| 1. 55 | Kpene et al. (2024) | Hospital-based retrospective study | Ghana (tertiary hospital) | Type 2 diabetes mellitus patients (n=141) | To classify kidney function using CKD-EPI equation and identify predictors of kidney dysfunction among T2DM patients | 70.2% had kidney dysfunction. Formal employment reduced odds of kidney dysfunction by 95% (aOR=0.05; 95% CI 0.004–0.645; p=0.021). Each unit increase in creatinine increased odds by 10% (aOR=1.10; 95% CI 1.06–1.14; p<0.001) | A significant proportion of T2DM patients experience kidney dysfunction. Occupation and creatinine levels are independent predictors. Urgent education for T2DM patients (especially unemployed/informally employed) on preventive measures and regular creatinine monitoring is needed, given the high cost of managing kidney disease |
| 1. 56 | Kroll et al. (2019) | Cross-sectional household survey with georeferenced food consumption data (classified by obesity risk/protection using NOVA-inspired and nutrient-based criteria) combined with spatial mapping and outlet density/distribution analysis | Khayelitsha (urban township, Cape Town, South Africa) and Ahodwo (urban neighbourhood, Kumasi, Ghana) | Households in two low-income urban communities and associated food retail outlets (formal supermarkets and informal outlets) | To correlate neighbourhood food provision (availability, accessibility, and risk profile of outlets) with household food consumption patterns and poverty, and to assess the mediating role of food environments in dietary transitions | In Khayelitsha, 71% of households exceeded obesogenic dietary risk thresholds (vs. 26% in Ahodwo) while protective diets were more prevalent in Ahodwo (23%); supermarkets were a dominant household food source in Khayelitsha; Khayelitsha outlets provided greater access to both obesogenic (57%) and protective (43%) foods than Ahodwo (39% and 16%); consumption–provision correlation was stronger in Ahodwo (r=0.862) than Khayelitsha (r=0.624); income-deprived households in Khayelitsha consumed significantly less obesogenic/protective diets (p<0.005) | Risky food environments and poverty interact synergistically to drive obesogenic diets; urban food system governance must address supermarket penetration and informal retail dynamics to promote healthier food environments and mitigate nutrition transitions in sub-Saharan African cities |
| 1. 57 | Kushitor et al. (2023) | Cross-sectional study (part of Urban Health and Poverty Survey, Waves 2 & 3) | Ghana (three low-income urban communities in Accra: Agbogbloshie, James Town, Ussher Town) | Adults in low-income urban communities (n=960 in 2011; n=782 in 2013) | To examine dietary patterns and changes between 2011 and 2013 using factor analysis and NOVA classification | Frequency of animal-source foods and fruits increased in 2013 vs 2011. Intake of processed culinary ingredients (NOVA Group 2), processed foods (Group 3), and ultra-processed foods (Group 4) was higher in 2013. Three patterns identified (rice-based, snack-based, staple & stew/soup); snack pattern consumption rose from 35% to 41% | Complex interplay of personal and socio-cultural factors influenced dietary intake. Health promotion programmes at community level are needed to address rising processed food consumption |
| 1. 58 | Kushitor et al. (2025) | Mixed-methods study (quantitative Diet Quality Questionnaire, n=854; 30 focus-group discussions; integrated analysis) | Ga Mashie (James Town and Ussher Town), urban Accra, Ghana | Urban poor residents in a coastal Ga ethnic community | To document historical and contemporary shifts in food consumption, acquisition, and preparation practices and to assess current diet quality using NCD-protect/risk scores | Diets have hybridised: traditional staples (fufu, kenkey, ampesi from cassava/corn/plantains) persist alongside modern items (instant noodles 6%, rice 67%, SSBs 21%, Milo 21%); mean food-group diversity is low (3.8±1.5); 47% food insecurity; high consumption of NCD-risk items (deep-fried foods 23%, red meat 22%, SSBs 21%) and modest NCD-protect foods (whole grains 63%, vegetables 69%); shift from home-cooked communal meals to out-of-home eating | Interventions must address food insecurity and the nutrition transition by promoting affordable, culturally acceptable hybrid diets that increase protective foods and reduce ultra-processed items; align actions with Agenda 2030 to improve diet quality and NCD outcomes in urban poor settings |
| 1. 59 | Lane et al. (2024) | Systematic umbrella review of epidemiological meta-analyses | Global (45 pooled analyses from existing meta-analyses) | Populations across life course in observational studies (cohort, case-control, cross-sectional) examining UPF exposure (NOVA) | To evaluate the credibility and strength of meta-analytic evidence linking UPF exposure to adverse health outcomes using pre-specified classification criteria and GRADE | Convincing (Class I) evidence for UPF and CVD mortality, T2D (dose-response), anxiety, and common mental disorders; highly suggestive (Class II) evidence for all-cause mortality, heart disease mortality, depression, obesity, adverse sleep, and wheezing; 71% of 45 pooled analyses showed direct associations | Greater UPF exposure is consistently associated with adverse cardiometabolic, mental, and mortality outcomes; urgent population-level policies and public health measures are warranted to reduce UPF consumption, alongside mechanistic research |
| 1. 60 | Laar et al. (2020) | Expert panel assessment using the adapted Healthy Food-Environment Policy Index (Food-EPI); 43 good-practice indicators rated against international best practice | Ghana (national level) | Government policies and infrastructure support for healthy food environments; 19 government and independent experts | To assess government action on food-environment policies, identify implementation gaps, and prioritise actions to improve the food environment and prevent nutrition-related NCDs | Three-quarters of indicators rated ‘low’ or ‘very little’ implementation. Only one indicator (restricting marketing of breast-milk substitutes) rated ‘very high’. Highest-priority actions: restricting unhealthy food marketing to children and in media; providing funds for nutrition/NCD research; strengthening leadership, monitoring and evaluation | National stakeholders recommended legislative and leadership actions. The study provides a baseline for measuring government progress toward implementing effective policies to prevent nutrition-related NCDs in Ghana and other lower-middle-income countries |
| 1. 67 | Manyara et al. (2024) | Mixed-methods scoping review (73 quantitative, 20 qualitative, 8 mixed-methods studies) | Sub-Saharan Africa (2000–2023) | Men and women without diabetes (mean ages 20–63 years) | To synthesise evidence on knowledge, perceptions, and practices toward modifiable type 2 diabetes risk factors (excess weight, unhealthy diet, physical inactivity). | Most participants knew the three main modifiable risk factors, yet most with excess weight underestimated their weight status. Ideal body weight was often described as “not too skinny but not too fat”. Practices showed low weight-control engagement, high sugar intake, low fruit/vegetable intake, but moderate-to-high physical activity. Barriers were social (societal preference for larger body sizes) and environmental (affordability/access to healthy foods and activity facilities). | Multicomponent diabetes-prevention interventions are required that improve accurate risk identification (e.g., excess weight) and create supportive social/physical environments (healthy food availability, physical-activity facilities, and shifted societal norms). |
| 1. 68 | Mensah (2021) | Mixed-methods PhD thesis (systematic review/meta-analysis + geographical mapping + qualitative focus groups/dyadic interviews with emerging adults) | Sub-Saharan Africa (focus on university food environments and emerging adults) | Emerging adults (university students) and broader SSA food-system drivers of healthy, sustainable diets | To map the epidemiology and multi-level drivers of healthy and sustainable diets in SSA, with particular emphasis on changing food environments and university settings | Rapid nutrition transition, urbanisation, trade liberalisation, and food-environment changes are driving increased consumption of ultra-processed foods, rising obesity/NCDs, and environmental degradation. University food environments shape emerging-adult dietary behaviours through availability, affordability, and social norms. Socio-ecological factors operate at individual, interpersonal, community, and policy levels. | Implement multi-level interventions targeting university food environments (e.g., healthier food provisioning, pricing, and education); develop SSA-specific policies that promote sustainable dietary patterns while addressing the double burden of malnutrition; prioritise research on food-system drivers among young adults. |
| 1. 69 | Mockshell et al. (2022) | Observational macro-scan (rapid store-audit technique) using Likert-scale ratings of availability, accessibility and affordability | Urban Ghana (Accra, Cape Coast, Koforidua) | Urban food retail outlets (supermarkets, mobile marts, container shops/kiosks, traditional/wet markets; n=123) | To characterise the urban food environment by examining availability, accessibility (affordability) and level of processing (NOVA classification: unprocessed, processed culinary ingredients, processed, ultra-processed) of foods | All four food categories were highly available, accessible and affordable. Processed foods dominated; ultra-processed foods accounted for >30% of all processed foods and were as available/affordable as unprocessed foods | Physical and economic access to food is not a major constraint in urban Ghana. However, the high availability and accessibility of ultra-processed foods has serious potential health implications. Regulation is needed to prevent over-consumption of ultra-processed foods and the resulting increase in obesity and other nutrition-related NCDs |
| 1. 70 | Okoye et al. (2024) | Narrative mini-review of literature | Africa (four regions: East, West, Southern, Central) | African populations undergoing food system changes | To synthesise evidence on how food systems transformation affects dietary patterns and public health in Africa | Urbanization, trade liberalization, and supermarket expansion have shifted diets toward processed, energy-dense foods. This has led to a double burden of malnutrition and increased NCD risk, exacerbated by climate change and political instability | Investments in sustainable agriculture, nutrition-sensitive policies, and comprehensive food security strategies are urgently needed to promote equitable food systems and reverse adverse health impacts |
| 1. 71 | Osei-Kwasi et al. (2020) | Systematic mapping review | Urban Africa (15 countries including Ghana) | Healthy adolescents (11–17 years) and adults (18–70 years) | To identify factors influencing dietary behaviours in urban food environments in Africa and prioritise future research | 77 factors identified (mostly individual-level: 45/77; social: 11; physical: 12; macro: 9). Adolescent-specific individual factors included self-esteem, body satisfaction, dieting, school attendance, pubertal development. Social factors more investigated among adolescents (e.g., sharing food with friends) | Dominance of individual-level studies suggests need for research on how social, physical, and macro-level environments drive dietary behaviours, particularly for adolescents and men. More studies needed to widen geographical scope across all African countries |
| 1. 72 | Popkin et al. (2020) | Narrative review and synthesis (Lancet Series on the Double Burden of Malnutrition) | Global, with focus on low- and middle-income countries (LMICs) | Populations in LMICs experiencing nutrition transition | To describe the dynamics, drivers, and consequences of the double burden of malnutrition (DBM) and changing nutrition reality | DBM has increased sharply in the poorest LMICs due to rapid rises in overweight/obesity driven by food system changes (ultra-processed foods) and reduced physical activity. Stunting from earlier decades continues to elevate later-life NCD risk | Targeted interventions addressing critical drivers (food systems, physical activity) are needed at all levels to reduce DBM and prevent long-term NCD burden |
| 1. 73 | Popkin & Laar (2025) | Narrative review and trend analysis using DHS, NCD-RisC, Euromonitor, and national survey data | Low- and middle-income countries (global with LMIC emphasis, including Ghana) | Infants, toddlers (0–4 years), and their mothers | To examine ultra-processed food (UPF) consumption trends among preschoolers and implications for stunting, overweight/obesity, and long-term health. | Overweight/obesity rising rapidly among children and mothers while stunting declines slowly. UPF consumption (high in added sugar/sodium) increasing sharply among 0–4-year-olds, even in poorer households. Early exposure shapes lifelong preferences for unhealthy foods. | Expand WHO Code protections to 0–3-year-olds and implement front-of-package warning labels on UPFs for young children to limit added sugar and sodium. Urgent policy and programmatic actions are needed to reverse harmful dietary shifts in LMICs. |
| 1. 74 | Reardon et al. (2021) | Narrative review and synthesis (integration of national consumption surveys, food-system data, and epidemiological trends) | Sub-Saharan Africa (SSA) | African food systems, consumers, and the double burden of malnutrition (DBM: stunting + overweight/obesity) | To examine the processed-food revolution in African food systems and its linkage to the double burden of malnutrition, including the role of ultra-processed foods (UPF) | Rapid rise in processed (including 10–30% ultra-processed) food purchases driven by urbanization, rising female labor-force participation, and convenience demand; DBM is pronounced in SSA with persistent high stunting alongside rising obesity; processed food system provides jobs and some nutritional benefits but UPF portion drives NCD risk | Pursue “double-duty” actions (e.g., healthy weaning foods for stunting; SSB taxes, nutrition labelling, and other measures to steer consumers away from unhealthy UPF); implement gradually given extreme fragmentation of informal SMEs and limited government implementation capacity |
| 1. 75 | Sambu et al. (2024) | Scoping review (25 peer-reviewed studies 2010–Feb 2022; mapped onto HLPE Sustainable Food Systems Framework domains and macro/meso/micro levels) | Ghana (adolescent-focused studies) | Adolescents (school- and community-based) consuming industrial/ultra-processed foods (UPFs) | To examine how the HLPE Food Systems Framework and interdisciplinary systems thinking are applied in research on UPF/industrial-diet consumption among Ghanaian adolescents; to identify methodological and policy gaps | Research remains siloed, predominantly behavioural/nutritional, and quantitatively biased; limited integration across food-system domains (production, processing, retail, consumption) or macro–meso–micro levels; weak linkage between national trade/regulation policies and adolescent food environments | Future studies must adopt explicit systems-thinking approaches with multi-level, interdisciplinary designs; bridge national food-governance policies (trade, regulation) with local adolescent food-environment interventions to effectively address UPF-driven NCD risk in Ghana and similar SSA contexts |
| 1. 76 | Sanni (2025) | Narrative review of peer-reviewed literature (2005–2024) | West Africa (regional synthesis) | Populations undergoing nutrition transition | To explore the nutrition transition in West Africa, its public health challenges, socioeconomic impacts, and policy interventions. | Rapid shift from traditional diets to energy-dense, ultra-processed foods driven by urbanisation, globalisation, and income growth. Double burden of malnutrition (undernutrition + rising obesity/NCDs) evident, especially among women, children, and urban poor. Policy responses remain fragmented. | Implement integrated, region-specific strategies emphasising nutrition education, sustainable agriculture, and multi-sectoral collaboration. Strengthen surveillance, promote healthy food environments, and address equity to reverse harmful dietary trends. |
| 1. 77 | Vanderkooy et al. (2023) | Cross-sectional study | Senegal (Guédiawaye Department) | 12–35.9-month-old children and primary caregivers (n=724) | To assess UFB consumption patterns/contribution to energy intake, associations with dietary/nutrition outcomes, and drivers of commercial UFB choice | UFB contributed 22.2% of TEI-NBF (5.9% lowest tercile, 39.9% highest). High UFB consumers had significantly less nutrient-dense diets (protein, fibre, 7/11 micronutrients; more fat/sugar). No anthropometric associations. Drivers: child preference, behaviour management, treats/gifts, sharing | High UFB consumption associated with poor diet quality. Addressing high UFB consumption during this critical developmental period should be prioritised in young child nutrition research, programming, and policy development |
| 1. 78 | Vitale M, Costabile G, Testa R et al. (2024) | Systematic review and meta-analysis of prospective cohort studies (NutriGrade quality assessment) | Global (multiple cohorts) | Adults (≥18 y) | To quantify associations between UPF consumption and risk of diabetes, hypertension, dyslipidaemia, and obesity; examine differential effects by assessment methodology and intake level. | High UPF intake associated with 37 % higher diabetes risk, 32 % hypertension, 47 % hypertriglyceridaemia, 43 % low HDL, and 32 % obesity; risks varied >50 % depending on UPF assessment method (24 h recall vs. FFQ vs. other); no significant difference by absolute intake level; overall evidence quality rated low-moderate. | Caution is required when interpreting and extrapolating UPF–cardiometabolic risk associations because of substantial methodological heterogeneity; improved standardisation of UPF assessment is needed. |
| 1. 79 | Vuvor & Harrison (2017) | Cross-sectional survey (modified WHO STEP-wise questionnaire) | Ghana (one municipality, Junior High Schools) | Junior High School students aged ~12–15 years (n=273) | To assess knowledge, practice, and perception of consuming soft drinks with food and associated metabolic effects | 22.2% had no knowledge that sugar/carbohydrate is a nutrient in soft drinks. 58.4% were aware of health implications (e.g., weight gain), but practice remains common (at least once weekly). BMI not significantly associated with frequency of consumption | Students have limited knowledge of nutrients in soft drinks despite awareness of health risks. Targeted nutrition education on soft drink consumption is needed in schools to reduce long-term metabolic risks |
| 1. 80 | Yussif et al. (2025) | Prospective cohort study (RODAM-Pros) | Ghana (rural and urban) and Europe (Amsterdam) | Ghanaian adults in rural Ghana, urban Ghana, and Ghanaian migrants in Amsterdam | To assess longitudinal changes in processed and ultra-processed food intake and their daily caloric contribution among Ghanaian populations | Significant increase in ultra-processed food consumption among migrants in Amsterdam (72.7% increase); no significant change in rural/urban Ghana. Processed food consumption increased across all sites (53.4% rural, 33.1% urban, 220% migrants). Percentage energy contribution from processed foods rose significantly in all groups | Dietary changes towards increased processed and ultra-processed foods are occurring, particularly among migrants. Monitoring and context-specific interventions are needed to curb the nutrition transition and its health impacts in Ghanaian populations |
| 1. 81 | Abubakar G (2023) | Opinion piece / blog post (qualitative cultural analysis) | Ghana (national, with focus on urban youth and Accra) | Ghanaian youth and general public; ultra-processed foods (UPFs) and cultural perceptions | To unravel the popular Ghanaian misconception that consuming “fresh foods” (ironically referring to UPFs) makes one look youthful/“fresh” and to examine its public-health implications. | The youth saying “if you want to look fresh, eat fresh foods” equates UPFs (e.g., “fresh” yoghurt, soya milk, chocolate drinks, fast-food items) with vitality; however, UPFs are industrially engineered, high in refined sugars, trans fats, and salt, and are linked to insulin resistance, obesity, type 2 diabetes (≈2.4 million cases and ≈5,400 deaths in Ghana in 2019), cancer, inflammation, poor mental health, and accelerated aging (dry, inelastic, wrinkled skin). The term “fresh” refers only to taste/marketing, not nutritional value. | Address the misconception through informed public-health action, counter marketing misinformation, and policy interventions to reduce UPF promotion and consumption in Ghana. |
